# Supplementary material for: Effects of Microbial Communities on Volatile Profiles and Biogenic Amines in Beef Jerky from Inner Mongolian Districts
Source: MDPI journal article supplement (doi:10.3390/foods11172659), 2022-09-01
Supplement: s1 [file s1]

**Table S1.** Concentrations of volatile compound during jerky (µg/kg).

1

| Volatile compound           | S1          | S2         | S3         | S4          | S5        | S6        | S7         | S8         | S9         | S10        | S11        | S12       | S13       | S14        | S15        | S16        |
|-----------------------------|-------------|------------|------------|-------------|-----------|-----------|------------|------------|------------|------------|------------|-----------|-----------|------------|------------|------------|
| <b>Alcohols</b>             |             |            |            |             |           |           |            |            |            |            |            |           |           |            |            |            |
| 1-Pentanol                  | -           | -          | -          | -           | -         | -         | -          | -          | -          | 0.18±0.03  | 0.5±0.15   | 0.21±0.01 | -         | -          | -          | -          |
| 2-Furanmethanol             | -           | -          | -          | 5.85±1.11   | -         | -         | 0.29±0.04  | -          | -          | -          | 0.51±0.04  | -         | -         | -          | 1.4±0.24   | 1.33±0.26  |
| Furfuryl alcohol            | -           | 1.45±0.25  | -          | -           | -         | -         | -          | -          | -          | -          | -          | 0.6±0.05  | 0.54±0.02 | -          | -          | -          |
| 1-Hexanol                   | -           | -          | -          | 0.71±0.11   | 0.42±0.09 | 0.49±0.03 | 0.15±0.05  | 0.35±0.07  | 0.71±0.1   | 0.26±0.06  | 0.43±0.12  | -         | -         | -          | 0.29±0.07  | 0.35±0.03  |
| 1-Heptanol                  | -           | 2.24±0.3   | 0.65±0.03  | -           | 0.24±0.04 | -         | 0.57±0.05  | 0.31±0.03  | 1.11±0.18  | 0.81±0.17  | 0.39±0.01  | 0.46±0.03 | -         | -          | 0.87±0.19  | 1.16±0.27  |
| 1-Octen-3-ol                | -           | 10.19±1.49 | 3.81±0.68  | 6.8±1.06    | 1.18±0.03 | -         | -          | 4.26±0.74  | 13.81±2.43 | 0.79±0.17  | -          | -         | -         | 0.43±0.09  | 0.8±0.14   | 1.83±0.39  |
| 4-ethyl cyclohexanol        | -           | 0.89±0.33  | -          | -           | -         | -         | 0.15±0.01  | -          | -          | 0.25±0.05  | -          | -         | -         | -          | 0.23±0.05  | 0.79±0.11  |
| Glycerin                    | -           | -          | 0.59±0.04  | -           | -         | -         | -          | 0.32±0.06  | 0.45±0.06  | 0.16±0.02  | -          | -         | -         | -          | 0.28±0.06  | 0.83±0.2   |
| trans-2-Octen-1-ol          | 1.02±0.21   | 3.04±0.18  | 1.72±0.35  | 1.62±0.2    | 0.16±0.03 | 0.34±0.01 | -          | 1.1±0.17   | 2.53±0.29  | 0.33±0.05  | 0.71±0.14  | 0.19±0.01 | -         | -          | 0.27±0.06  | 0.65±0.07  |
| 1-Octanol                   | 1.33±0.19   | 5.66±0.75  | 1.64±0.28  | 2.2±0.02    | 0.67±0.12 | 0.57±0.01 | 1.58±0.34  | 3.23±0.57  | 3.18±0.54  | 2.02±0.1   | 1.65±0.35  | 1.42±0.22 | 1.54±0.31 | 0.59±0.02  | 2.81±0.61  | 2.8±0.02   |
| Linalool                    | 2.14±0.31   | 1±0.15     | 11.42±1.85 | 13.97±2.09  | 1.05±0.08 | -         | -          | -          | -          | 15.58±2.64 | -          | -         | 2.05±0.3  | 0.99±0.05  | -          | -          |
| 2,4-Dimethylcyclohexanol    | -           | -          | 0.71±0.05  | -           | -         | -         | -          | -          | -          | -          | 0.27±0.09  | -         | 0.33±0.02 | -          | 0.44±0.06  | -          |
| Terpinen-4-ol               | 1.64±0.39   | 0.55±0.04  | 2.51±0.24  | 1.59±0.34   | 0.47±0.03 | -         | 0.19±0.05  | -          | -          | 1.26±0.21  | 0.73±0.04  | 0.35±0.05 | -         | 0.77±0.01  | -          | -          |
| 1-Octanol,2-butyl-          | -           | -          | -          | 0.54±0.1    | 0.4±0.03  | 0.21±0.01 | -          | -          | -          | -          | 0.99±0.18  | 0.2±0.01  | -         | -          | -          | -          |
| <b>Esters</b>               |             |            |            |             |           |           |            |            |            |            |            |           |           |            |            |            |
| Butyl acetate               | -           | -          | -          | -           | 0.16±0.02 | -         | -          | -          | -          | -          | -          | -         | 1.52±0.2  | -          | -          | -          |
| Vinyl caproate              | -           | 12.24±1.65 | -          | -           | 0.25±0.08 | -         | -          | 10.91±2.05 | 11.77±1.6  | -          | -          | -         | 0.48±0.02 | -          | 0.19±0.04  | 0.77±0.13  |
| Dimethyl glutarate          | -           | -          | -          | -           | -         | -         | 0.14±0.04  | -          | -          | -          | 3.09±0.49  | -         | -         | 0.18±0.02  | -          | -          |
| Ethyl phenylacetate         | 174.3±31.91 | -          | -          | 1.59±0.24   | 0.37±0.02 | 0.57±0.09 | 0.24±0.05  | -          | -          | 0.19±0.03  | 0.59±0.13  | 0.41±0.03 | 0.78±0.14 | 0.39±0.05  | -          | -          |
| Ethyl caprate               | -           | -          | -          | -           | -         | -         | -          | -          | -          | 0.18±0.02  | 0.2±0.05   | -         | -         | -          | -          | -          |
| Octyl salicylate            | -           | -          | -          | -           | 0.16±0.02 | -         | -          | -          | -          | -          | -          | -         | -         | -          | -          | 0.44±0.21  |
| Methyl hexadecanoate        | -           | -          | -          | -           | 0.18±0.07 | 0.35±0.06 | -          | -          | -          | 0.17±0.04  | 0.35±0.01  | 0.2±0.02  | -         | -          | -          | 0.25±0.06  |
| <b>aldehyde</b>             |             |            |            |             |           |           |            |            |            |            |            |           |           |            |            |            |
| Hexanal                     | 3.74±1.28   | -          | 2.48±0.67  | 4.16±0.46   | 4.38±0.46 | 0.99±0.25 | 1.13±0.21  | -          | -          | 1.99±0.25  | 1.61±0.07  | 1.53±0.12 | -         | 1.12±0.26  | 1.75±0.13  | 3.24±0.37  |
| Heptanal                    | 0.63±0.08   | 6.43±0.71  | 0.99±0.09  | 2.27±0.11   | 0.5±0.04  | 0.35±0.07 | 1.66±0.09  | 1.97±0.3   | 6.16±1.13  | 2.33±0.51  | 0.93±0.23  | 1.27±0.04 | 1.04±0.11 | 0.71±0.01  | 2.25±0.02  | 3.63±0.53  |
| Benzaldehyde                | -           | 9.63±1.04  | 6.23±1.83  | 2.12±0.14   | 1.76±0.1  | 1.02±0.1  | 1.23±0.42  | 3.21±0.59  | 5.04±0.52  | 1.51±0.29  | 2.12±0.64  | 2.2±0.31  | 2.05±0.27 | 1.57±0.42  | 1.6±0.36   | 1.03±0.08  |
| Octanal                     | 10.23±1.62  | 12.76±1.32 | 4.86±0.89  | 13.66±1.39  | 2.97±0.35 | 2.34±0.11 | 5.68±1.02  | 3.77±0.87  | 14.96±2.32 | 9.38±2.01  | 23.75±3.03 | 7.07±0.31 | -         | -          | 7.54±0.4   | 11.49±2.45 |
| 2-Octenal, (E)-             | -           | 7±0.42     | -          | 2.19±0.15   | 0.25±0.01 | -         | 1.13±0.36  | 2.22±0.42  | 4.79±0.83  | 0.82±0.26  | 1.89±0.29  | 0.76±0.2  | -         | 0.86±0.27  | -          | -          |
| Nonanal                     | 5.57±1.18   | 21.52±2.99 | 7.46±1.15  | 12.02±0.86  | 6.84±1.15 | 4.62±0.46 | 10.42±1.79 | 9.35±1.61  | 23.07±3.47 | 14.03±2.72 | 10.78±2.33 | 11±0.84   | 9.6±1     | 7.34±1.56  | 13.56±0.64 | 19.21±0.23 |
| Trans-2-nonenal             | 1.13±0.16   | 3.71±0.47  | 0.63±0.1   | 1.18±0.11   | 0.26±0.08 | 0.2±0.05  | 0.26±0.04  | 1.15±0.18  | 2.3±0.32   | 0.42±0.04  | 0.32±0.13  | 0.24±0.01 | -         | 0.21±0.05  | 0.55±0.19  | 0.44±0     |
| Decanal                     | 0.98±0.21   | 3.24±0.28  | -          | 173.16±1.85 | 0.13±0.01 | -         | 0.22±0.03  | 0.42±0.06  | 1.45±0.17  | 0.79±0.21  | 0.84±0.21  | 0.21±0.04 | -         | -          | 0.43±0.02  | 0.46±0.02  |
| 4-Isopropylbenzaldehyde     | -           | 0.55±0.07  | 2.27±0.26  | 24.97±3.02  | 6.53±0.72 | 0.65±0.12 | 0.17±0.08  | 0.55±0.06  | 6.16±1.24  | 0.8±0.07   | 1.96±0.4   | 2.24±0.07 | 0.96±0.19 | -          | 0.5±0.09   | 0.33±0.02  |
| trans-2-Decenal             | -           | 3.02±0.31  | 0.74±0.03  | 1.31±0.19   | 0.3±0.04  | 0.32±0.09 | 0.33±0.01  | 0.62±0.07  | 1.25±0.23  | 0.51±0.08  | 0.57±0.11  | 0.44±0.05 | 0.57±0.09 | 0.31±0.07  | 0.48±0.15  | 0.45±0.07  |
| 2-Undecenal                 | 1.62±0.34   | 2.31±0.16  | 0.56±0.04  | 0.81±0.06   | -         | 0.35±0.06 | 0.24±0.03  | -          | -          | 0.31±0     | 0.29±0.06  | 0.33±0.01 | 0.44±0.07 | 0.27±0.06  | 0.33±0.09  | 0.4±0.05   |
| Tetradecanal                | 1.39±0.38   | 1.67±0.45  | 0.57±0.2   | 2.88±0.55   | 2.27±0.1  | -         | 1.97±0.42  | -          | -          | 1.39±0.37  | 3.07±0.57  | 2.68±0.43 | 2±0.5     | 3.44±0.28  | 1.2±0.24   | 0.35±0.07  |
| <b>Ketones</b>              |             |            |            |             |           |           |            |            |            |            |            |           |           |            |            |            |
| 2-Heptanone                 | 2.73±0.59   | 1.43±0.35  | -          | 1.86±0.31   | 0.9±0.11  | -         | -          | -          | -          | -          | 1.41±0.28  | -         | -         | -          | -          | 0.37±0.06  |
| Methylheptenone             | 42.99±9.08  | -          | -          | -           | -         | -         | -          | -          | -          | 0.61±0.1   | -          | -         | 0.8±0.07  | -          | -          | -          |
| 2-Nonanone                  | 4.4±0.41    | 3.14±0.27  | 0.55±0.06  | 0.94±0.15   | 0.2±0.02  | -         | 0.25±0.08  | 0.39±0.05  | 0.96±0.17  | 0.7±0.15   | 0.64±0.16  | 0.19±0.02 | -         | -          | 0.42±0.09  | 0.67±0.01  |
| <b>Olefins</b>              |             |            |            |             |           |           |            |            |            |            |            |           |           |            |            |            |
| β-Pinene                    | -           | -          | -          | -           | -         | -         | 0.36±0.03  | -          | -          | -          | -          | 2.63±0.13 | 1.43±0.14 | 2.43±0.31  | -          | -          |
| Limonene                    | 10.84±2.12  | 2.2±0.11   | 25.68±3.54 | 6.37±1.04   | -         | 1.07±0.01 | 0.6±0.02   | -          | 17.98±3.19 | 1.33±0.25  | 3.16±0.86  | 0.64±0.03 | 21.7±1.53 | 4.49±0.56  | 0.24±0.06  | 0.27±0     |
| g-Terpinene                 | 70.31±13.45 | -          | 2.19±0.32  | -           | 0.19±0.01 | 0.4±0.11  | 0.12±0.03  | -          | 1.28±0.35  | 0.82±0.22  | 6.01±1.57  | 3.61±0.31 | 1.29±0.13 | 0.29±0.05  | 0.23±0.01  | -          |
| Longifolene                 | -           | -          | 0.61±0.04  | 0.6±0.07    | -         | -         | -          | -          | -          | -          | -          | 0.67±0.06 | 5.44±0.88 | -          | -          | -          |
| 1-Caryophyllene             | 1.11±0.26   | 0.53±0.06  | 3.05±0.32  | 6.5±0.9     | -         | 0.21±0.02 | -          | -          | -          | 0.61±0.09  | 1.7±0.39   | -         | -         | 1.78±0.26  | -          | -          |
| 2-Heptene                   | -           | -          | 2.6±0.38   | 4.21±0.42   | -         | -         | -          | -          | -          | 0.86±0.19  | 2.23±0.42  | -         | 1.25±0.26 | 0.41±0.07  | -          | -          |
| <b>Alkanes</b>              |             |            |            |             |           |           |            |            |            |            |            |           |           |            |            |            |
| Octane                      | -           | 0.52±0.06  | -          | -           | -         | -         | 0.2±0.01   | -          | 0.42±0.06  | 0.36±0.06  | -          | -         | -         | 0.38±0.03  | 0.86±0.09  | 0.79±0.14  |
| Undecane                    | -           | 0.52±0.07  | 2.72±0.48  | 2.35±0.31   | -         | 1.44±0.18 | 0.48±0     | -          | -          | -          | 1.02±0.27  | 0.83±0.05 | 1.16±0.11 | 0.52±0.06  | -          | -          |
| Tetradecane                 | -           | -          | -          | -           | 0.22±0.01 | 0.28±0.01 | -          | -          | -          | -          | 0.26±0.06  | 0.21±0.02 | 0.27±0.04 | 33.87±4.42 | -          | 0.25±0.08  |
| 1-Chlorooctadecane          | -           | 0.5±0.05   | -          | 0.63±0.09   | -         | 0.17±0.02 | 0.14±0.04  | -          | -          | 0.26±0.05  | 0.26±0.09  | 0.18±0.02 | 0.68±0.11 | -          | -          | -          |
| Nonadecane                  | -           | 1.72±0.11  | -          | 0.83±0.19   | -         | 0.41±0.07 | -          | 0.59±0.1   | 1.2±0.1    | 0.55±0.06  | 0.93±0.18  | 0.67±0.08 | 0.66±0.14 | 0.71±0.07  | 0.41±0.09  | 0.62±0.09  |
| <b>Acids</b>                |             |            |            |             |           |           |            |            |            |            |            |           |           |            |            |            |
| Hexanoic acid               | -           | -          | -          | -           | -         | -         | -          | -          | -          | -          | 0.93±0.03  | 0.56±0.02 | 0.81±0.07 | -          | -          | -          |
| Dodecanoic acid, 3-hydroxy- | -           | 3.03±0.22  | 2±0.2      | 3.76±0.21   | -         | 0.77±0.05 | 0.94±0.2   | 1.37±0.26  | 2.3±0.37   | 1.62±0.34  | 2.34±0.57  | 0.94±0.15 | -         | 0.92±0.07  | 1.54±0.34  | 2.63±0.66  |

|                             |           |           |           |           |           |           |           |           |           |           |           |           |           |           |           |           |           |
|-----------------------------|-----------|-----------|-----------|-----------|-----------|-----------|-----------|-----------|-----------|-----------|-----------|-----------|-----------|-----------|-----------|-----------|-----------|
| Pterin-6-carboxylic acid    | 3.06±0.64 | -         | -         | -         | 0.22±0.02 | -         | -         | -         | -         | -         | -         | 0.47±0.1  | -         | -         | -         | -         | -         |
| Decanoic acid               | -         | -         | -         | -         | 0.11±0    | -         | -         | -         | -         | -         | -         | 0.28±0.06 | -         | -         | -         | -         | -         |
| Undecanoic acid             | -         | -         | -         | -         | -         | -         | -         | 0.24±0.05 | 0.53±0.08 | 0.22±0.04 | 0.22±0.04 | -         | -         | 0.34±0.06 | 0.22±0.03 | 0.26±0.08 | 0.47±0.12 |
| Othere                      |           |           |           |           |           |           |           |           |           |           |           |           |           |           |           |           |           |
| 2-Methylpyrazine            | -         | -         | -         | -         | -         | -         | -         | -         | -         | -         | -         | 0.42±0.03 | -         | -         | -         | 0.52±0.08 | 0.31±0.06 |
| 4-Methylpyrimidine          | -         | 0.68±0.07 | 0.63±0.08 | 0.92±0.07 | -         | 0.57±0.04 | -         | 0.6±0.02  | 0.38±0    | 0.57±0.02 | 0.47±0.06 | 0.7±0.11  | 0.42±0.1  | -         | -         | 0.31±0.06 | 0.34±0.12 |
| p-Xylene                    | -         | -         | -         | -         | -         | -         | 0.15±0.04 | -         | 0.41±0.1  | 0.21±0.05 | 0.24±0.06 | -         | -         | 0.62±0    | -         | -         | -         |
| 2,6-Dimethylpyrazine        | -         | 1.46±0.17 | -         | 2.21±0.4  | -         | 0.62±0.03 | 1.28±0.23 | -         | -         | 1.21±0.27 | 2.76±0.6  | 1.55±0.19 | -         | -         | -         | 1.89±0.31 | -         |
| 1-isopropyl-2-methylbenzene | -         | -         | -         | 2.14±0.41 | -         | -         | -         | -         | 4.13±0.86 | -         | 5.17±0.94 | 1.82±0.16 | 0.64±0.04 | -         | -         | -         | -         |
| 2-Acetyl-3-methylpyrazine   | -         | -         | -         | -         | -         | -         | 0.14±0.05 | 0.27±0.05 | -         | -         | 0.23±0.02 | 0.15±0.03 | -         | -         | -         | -         | -         |
| Anethole                    | -         | 6.91±1.61 | -         | -         | 1.07±0.11 | 2±0.03    | 2.15±0.46 | 0.97±0.09 | 1.8±0.36  | 6.09±1.6  | -         | 1.19±0.25 | -         | -         | -         | 1.61±0.29 | -         |

“-” means not detecte.
